# Supplementary material
Source: Springer Nature journal article supplement (https://www.springermedizin.de/resource/supplementary/12986_2009_212_MOESM6_ESM.pdf/25655604)

Triglyceride  
High-carbohydrate meal

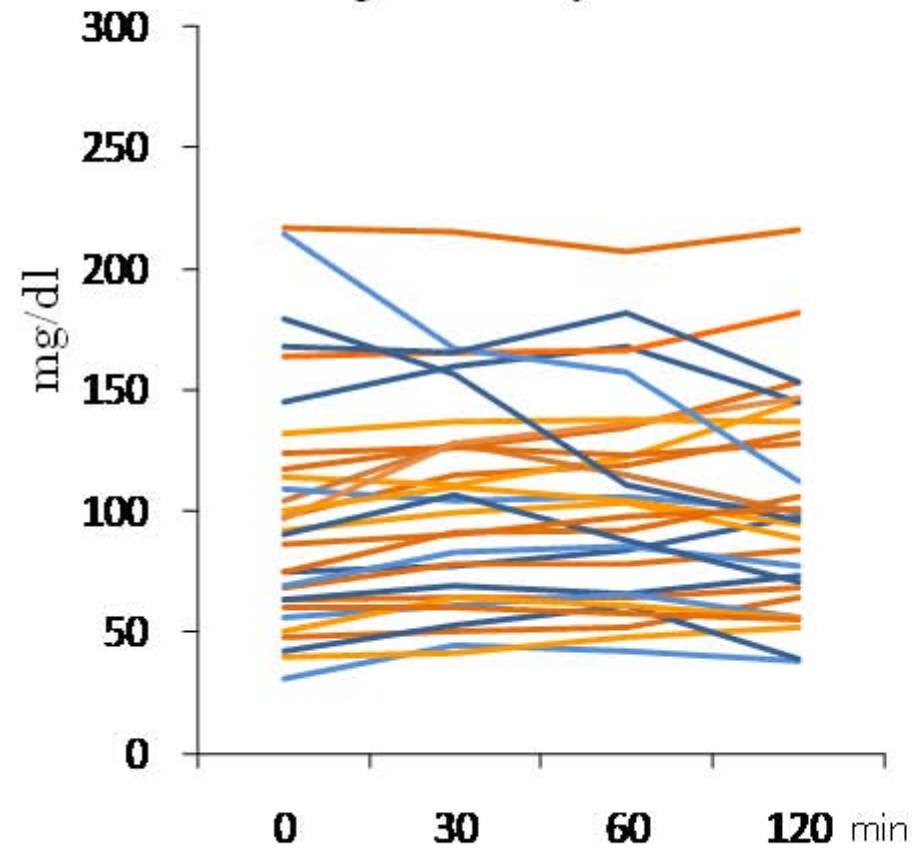

Triglyceride  
Low-carbohydrate meal

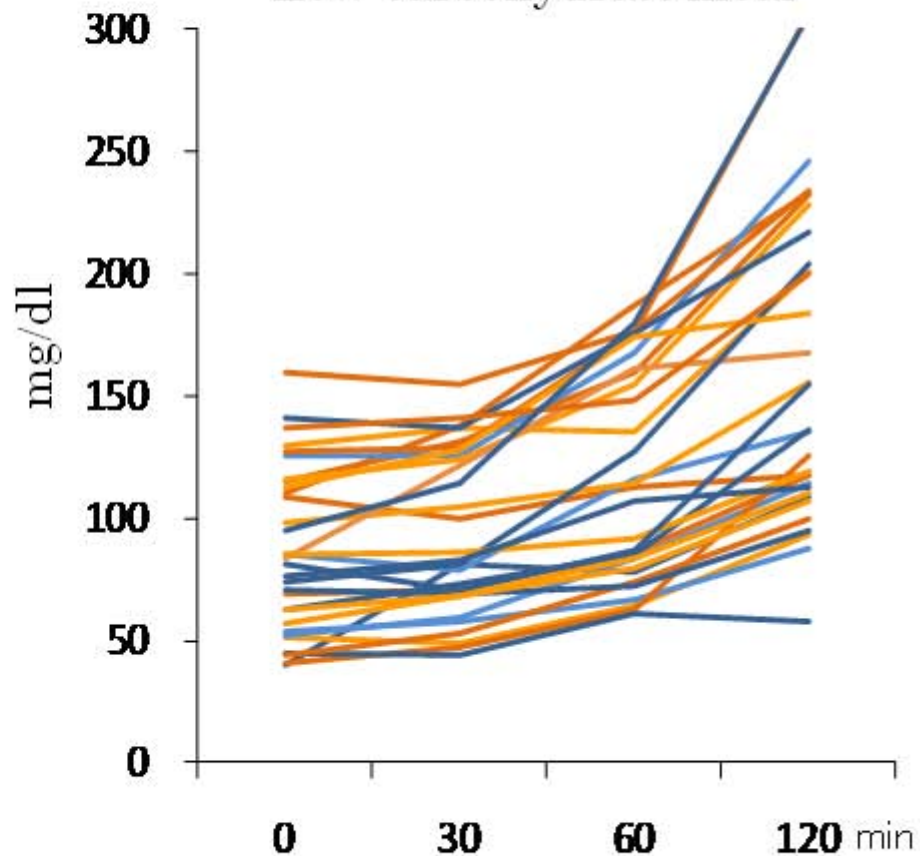

Supplement: MOESM6 [file 25655604]
